# Supplementary material for: Generation of a severe convective ionospheric storm under stable Rayleigh–Taylor conditions: triggering by meteors?
Source: Copernicus journal article supplement (doi:10.5194/angeo-34-165-2016), 2016-02-03
Supplement: Supplementary file 1 [file angeo-34-165-2016-supplement.zip]

Archive with 4 entries (4 files):
- Referee02-report.pdf
- Referee01-report.pdf
- Response to Referees.pdf
- angeo-34-165-2016-supplement-title-page.pdf
