# Supplementary material for: Generation of a severe convective ionospheric storm under stable Rayleigh–Taylor conditions: triggering by meteors?
Source: Copernicus journal article supplement (doi:10.5194/angeo-34-165-2016), 2016-02-03
Supplement: Supplementary file 1 [file angeo-34-165-2016-supplement.zip › angeo-34-165-2016-supplement-title-page.pdf]

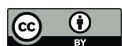

## *Supplement of*

# **Generation of a severe convective ionospheric storm under stable Rayleigh–Taylor conditions: triggering by meteors?**

**M. C. Kelley and R. R. Ilma**

*Correspondence to:* M. C. Kelley (mck13@cornell.edu)

- [angeo-34-165-2016-supplement-title-page.pdf](#)
- [Referee01-report.pdf](#)
- [Referee02-report.pdf](#)
- [Response to Referees.pdf](#)

The copyright of individual parts of the supplement might differ from the CC-BY 3.0 licence.
